# Supplementary material for: Nitric Oxide and Hydrogen Peroxide Signaling in Extractive Shiraia Fermentation by Triton X-100 for Hypocrellin A Production
Source: MDPI journal article supplement (doi:10.3390/ijms21030882), 2020-01-30
Supplement: s1 [file s1]

## **Electronic supplementary material**

### **Nitric Oxide and Hydrogen Peroxide Signaling in Extractive *Shiraia* Fermentation by Triton X-100 for Hypocrellin A**

Xin Ping Li <sup>1</sup>, Yue Wang <sup>1</sup>, Yan Jun Ma <sup>1</sup>, Jian Wen Wang <sup>1</sup>  
and Li Ping Zheng <sup>2,\*</sup>

\*Correspondence: lpzheng@suda.edu.cn; Tel.: +86-521-  
65880195

**Table S1.** Primers used in RT-qPCR. F: forward primer, R: reverse primer.

| Gene symbol | Gene name                        | Sequence                                           |
|-------------|----------------------------------|----------------------------------------------------|
| <i>PKS</i>  | Polyketide synthase              | F: TGCTGAGGTAGCAGTCAAGC<br>R: TTATGCTACGGTCGTCGCTC |
| <i>Mono</i> | Salicylate 1-monooxygenase       | F: TCTCGGGGAATTATGGCACG<br>R: ACAACCGTTCTCGCATCAGT |
| <i>OmeF</i> | O-methyltransferase              | F: GAACTACCTGAAGGCACGCT<br>R: GCTCGGAAGGATACTCGCTC |
| <i>MCO</i>  | Multicopper oxidase              | F: TATGGCGCTACGAGTGGAC<br>R: ACTCCCTGGCCGATAACGTA  |
| <i>FAD</i>  | FAD/FMN-containing dehydrogenase | F: TGTGACCGCCATCACCTTAC<br>R: TTGTCGTATGGGTGGGAAGC |
| <i>MFS</i>  | Major facilitator superfamily    | F: TCCCGTAGCCTTGCTTTCTG<br>R: CCGGCTTCTTCTTGACGCTA |
| <i>ABC</i>  | ATP-binding cassette             | F: GACTTGAGCCTATCCGCCTC<br>R: AGAGTCGCCTCTGTGATCCT |
| 18S rRNA    | 18S rRNA gene                    | F: GAAAGTTAGGGGATCGAAGA<br>R: TAGTCGGCATAGTTTACGGT |

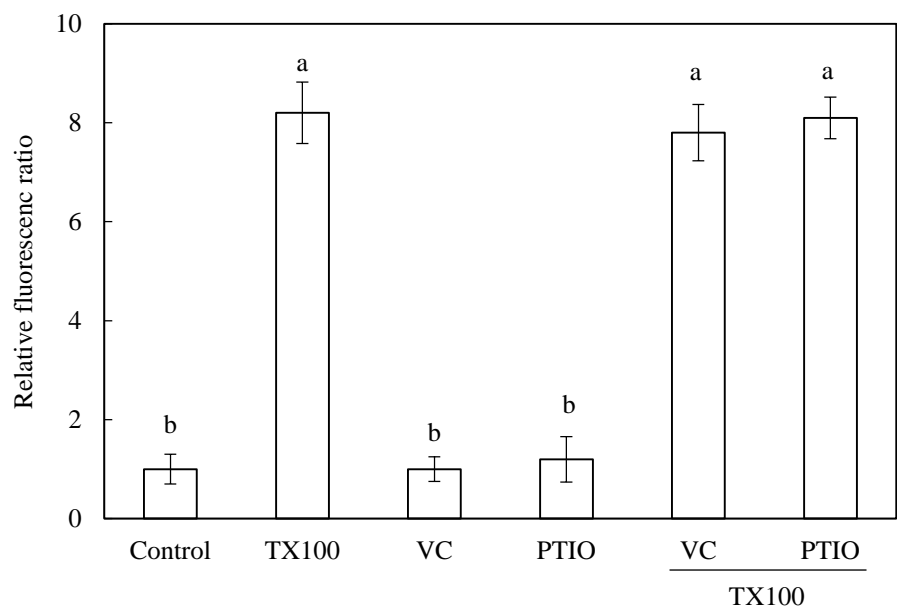

**Figure S1.** The effect of TX100, VC and PTTIO on membrane permeability of hyphal cells in the extractive fermentation. TX100 was added at 25 g/L at 36 h of the fermentation. The membrane integrity of hyphal cells was detected by a nucleic acid stain fluorescent dye SYTOX Green at 0.5  $\mu$ mol/L. The dosage and procedure for VC and PTIO addition was specified in Figure 3 and 4. The relative fluorescence ratio is defined to the ratio of fluorescence intensity at a given time to that of the control. Values are mean  $\pm$  SD from three independent experiments. Different letters above the bars mean significant differences ( $p < 0.05$ ).
